# Supplementary material for: Solution processable donor–acceptor oligothiophenes for bulk-heterojunction solar cells
Source: Royal Society of Chemistry journal article supplement (doi:10.1039/b926203b), 2010-01-01

## **Solution Processable Donor-Acceptor Oligothiophenes for Bulk-Heterojunction Solar Cells**

Weifeng Zhang,<sup>a</sup> Shing Chi Tse,<sup>b</sup> Jianping Lu,<sup>b</sup> Ye Tao,<sup>\*b</sup> and Man Shing Wong<sup>\*a</sup>

<sup>a</sup> *Department of Chemistry and Centre for Advanced Luminescence Materials, Hong Kong Baptist University, Kowloon Tong, Hong Kong SAR, China*

<sup>b</sup> *Institute for Microstructural Sciences (IMS), National Research Council of Canada (NRC), 1200 Montreal Road, Ottawa, ON K1A 0R6, Canada*

E-mail: [mswong@hkbu.edu.hk](mailto:mswong@hkbu.edu.hk); [Ye.Tao@nrc-cnrc.gc.ca](mailto:Ye.Tao@nrc-cnrc.gc.ca).

---

### Contents

- |                                                                                  |    |
|----------------------------------------------------------------------------------|----|
| 1. Results of Physical Characterization                                          | S2 |
| 2. The <sup>1</sup> H NMR and <sup>13</sup> C NMR spectra of new oligothiophenes | S3 |

## 1. Results of Physical Characterization

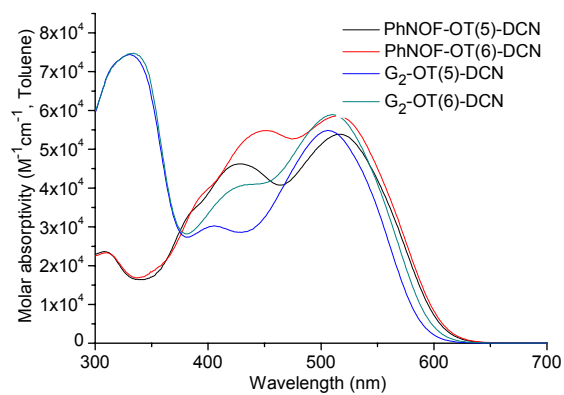

**Fig. S1** Absorption spectra of PhNOF-OT(n)-DCN and  $G_2$ -OT(n)-DCN in toluene.

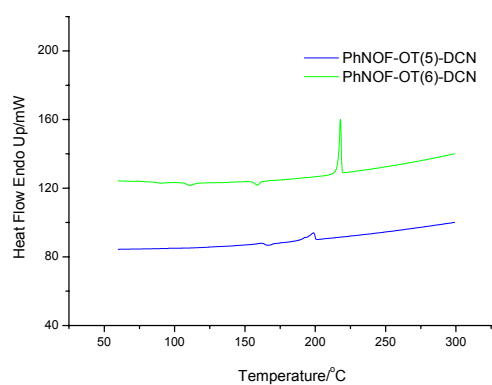

**Fig. S2** DSC traces of PhNOF-OT(n)-DCN.

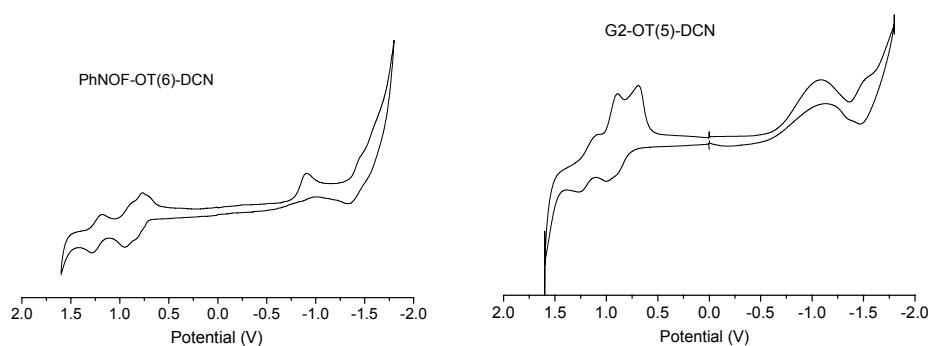

**Fig. S3** CV traces of PhNOF-OT(6)-DCN and  $G_2$ -OT(5)-DCN.

2. The  $^1\text{H}$  NMR and  $^{13}\text{C}$  NMR spectra of new oligothiophenes

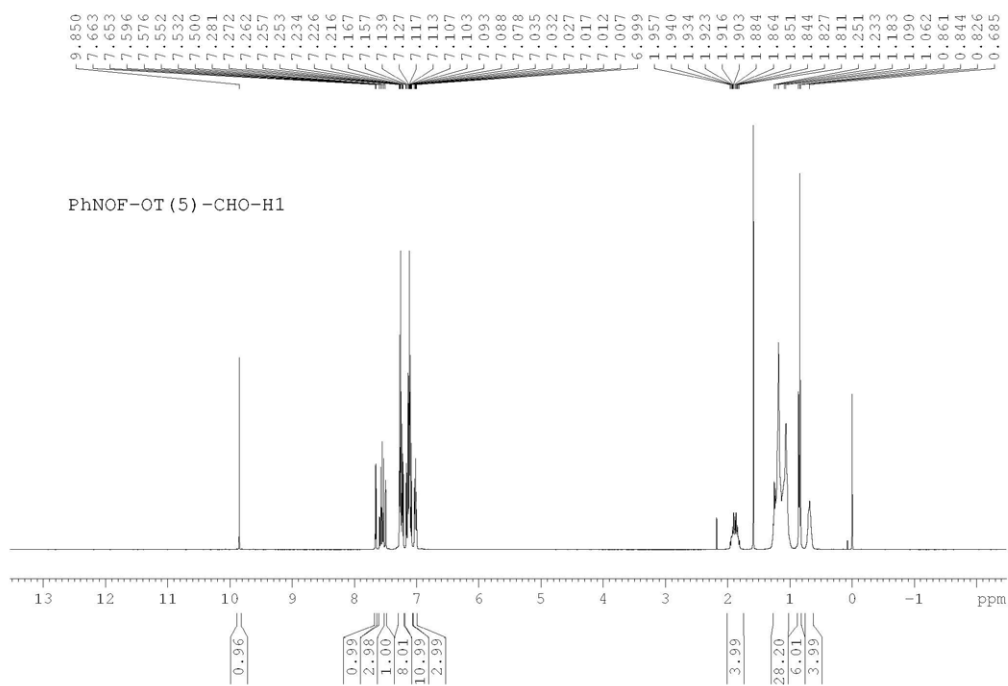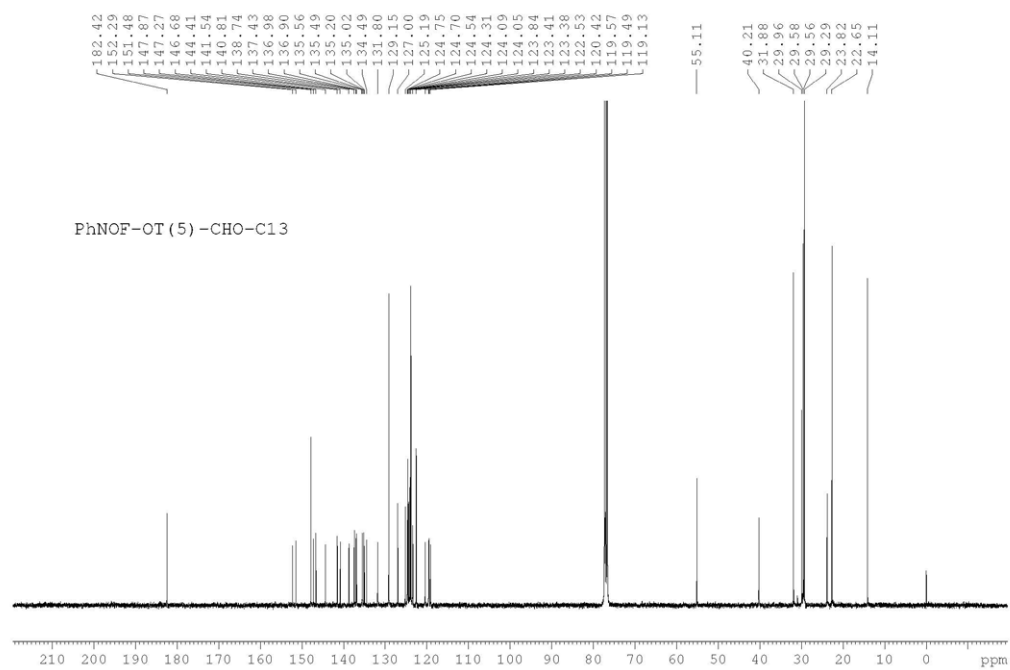

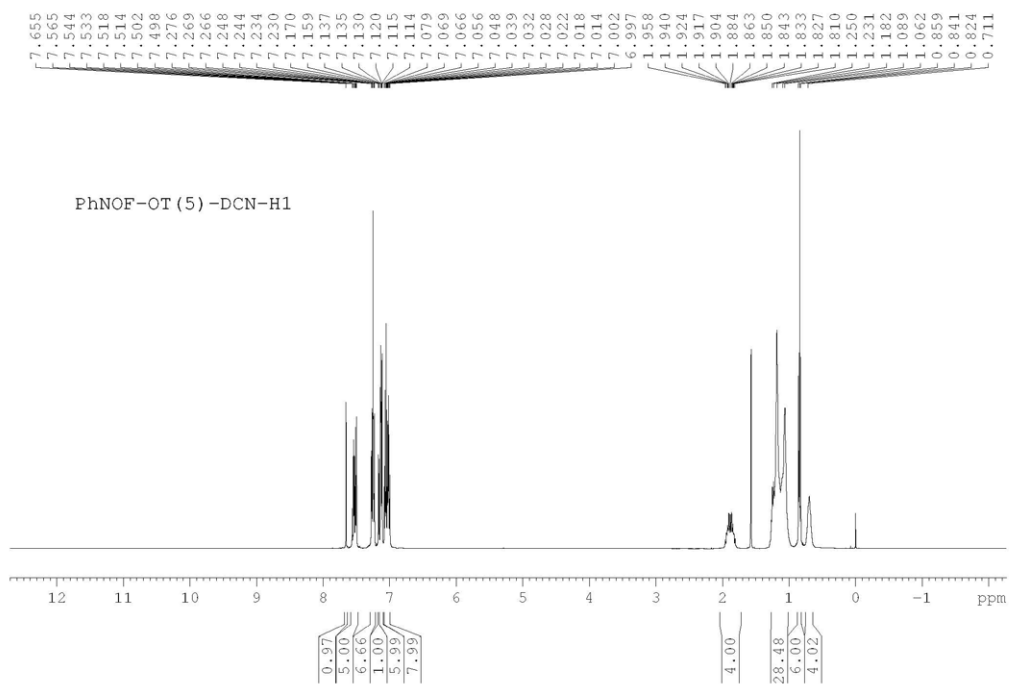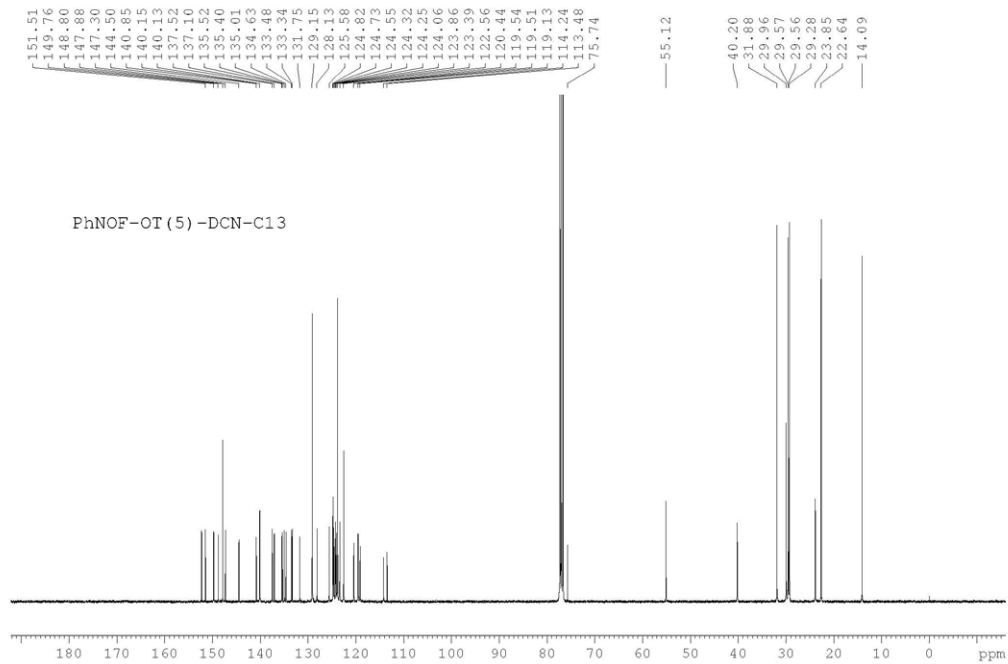

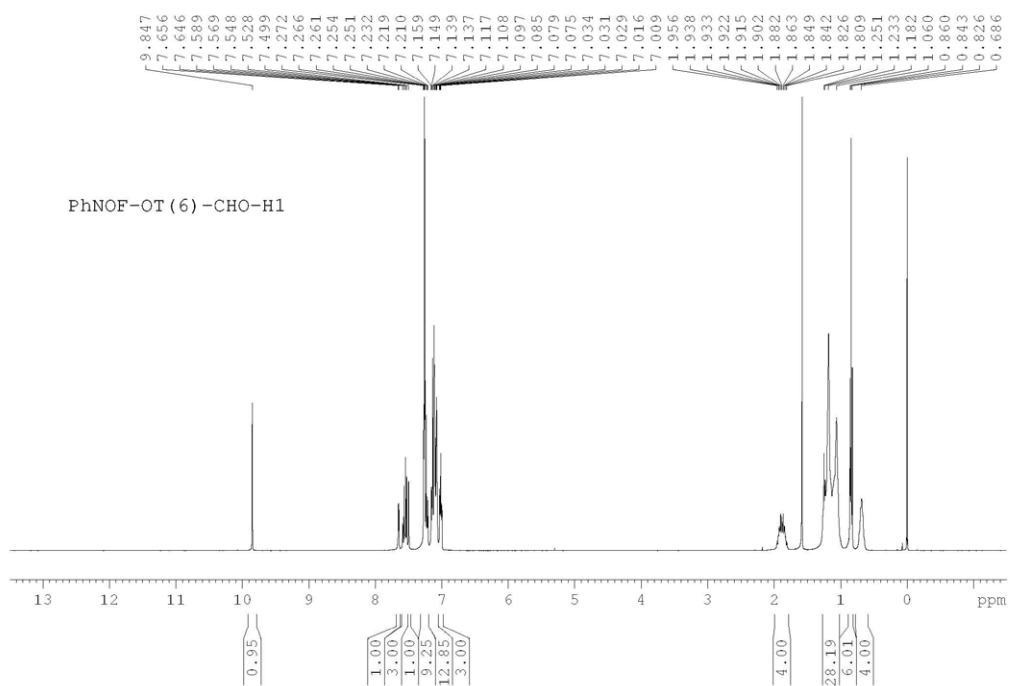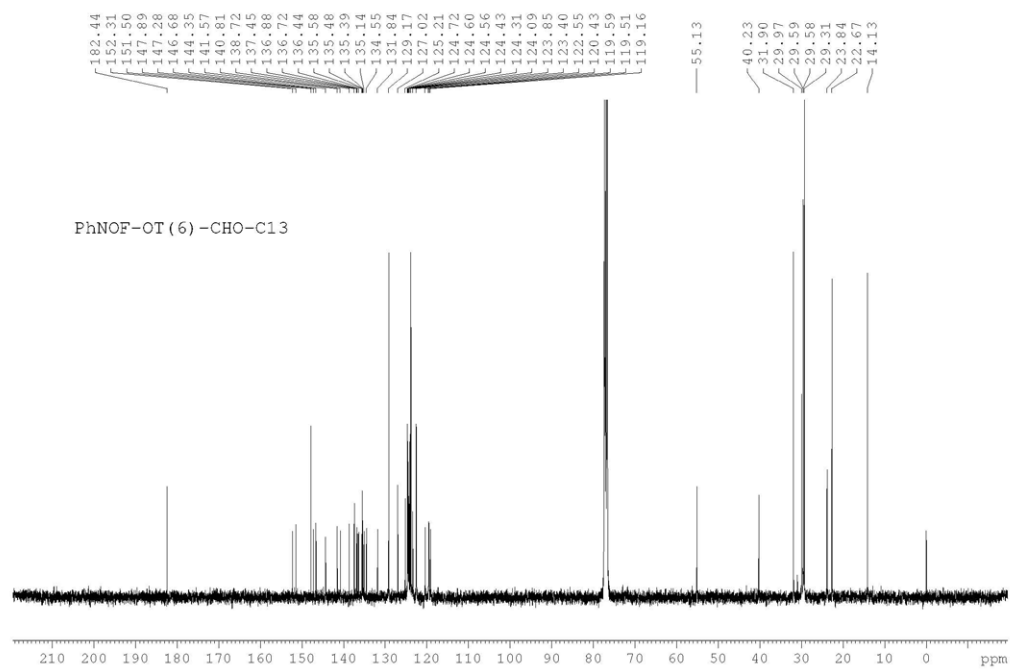

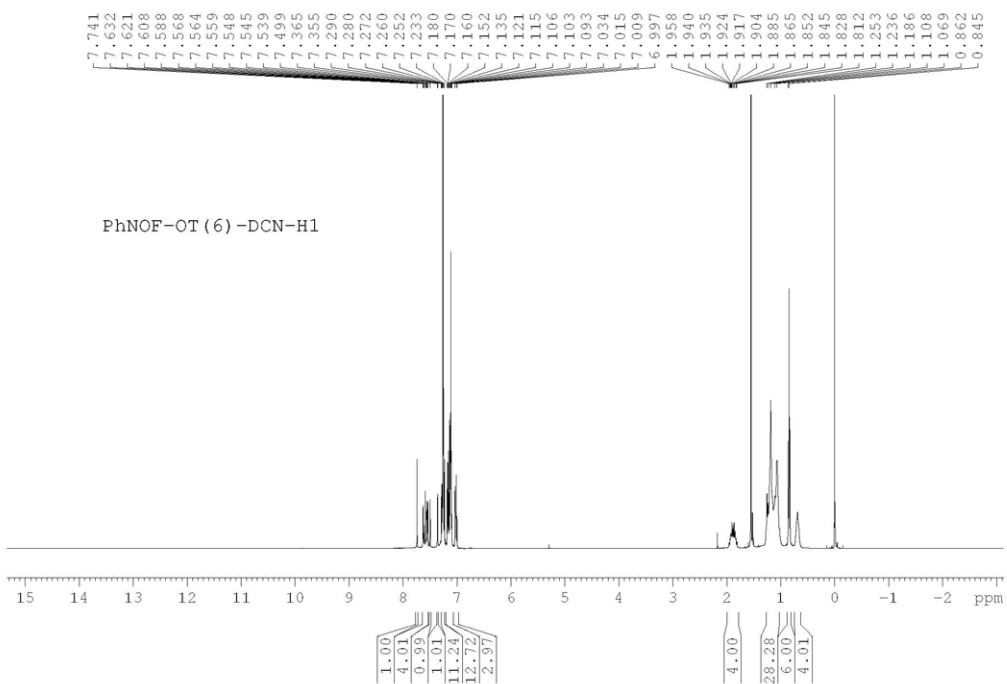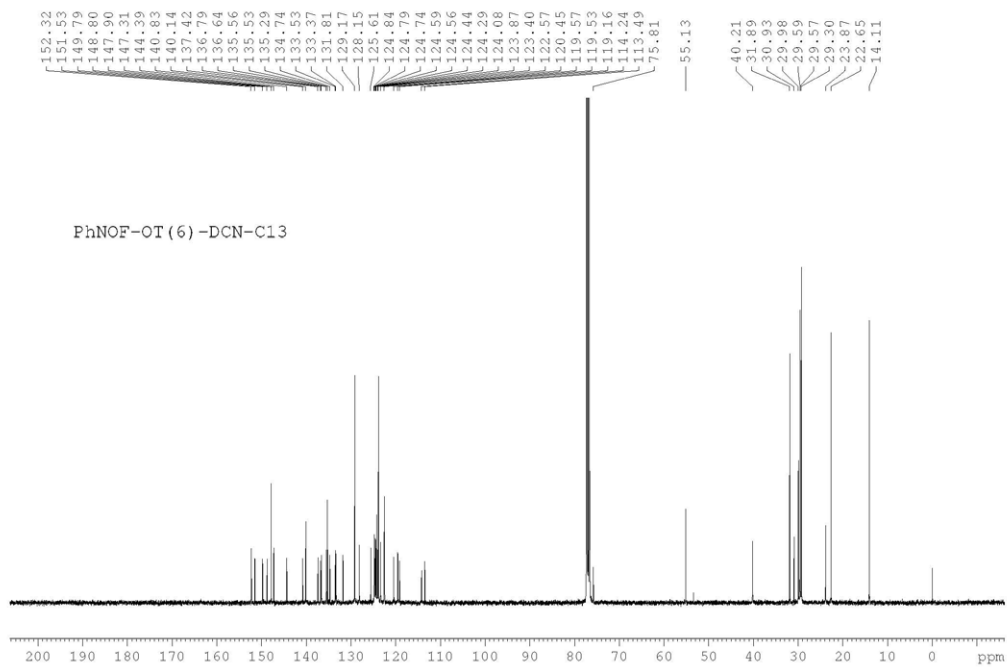

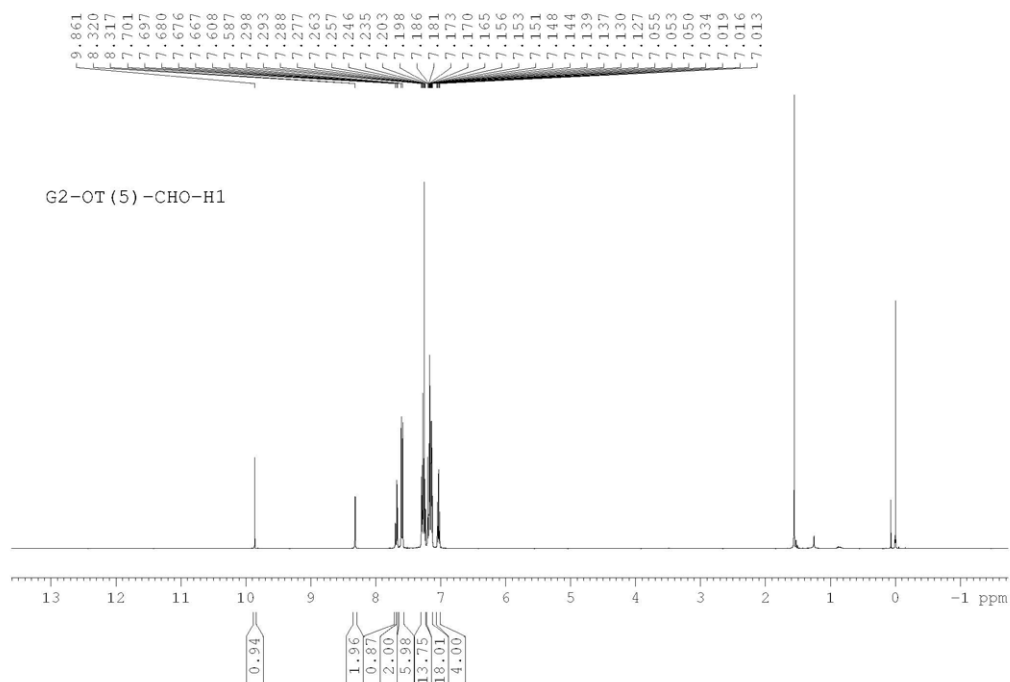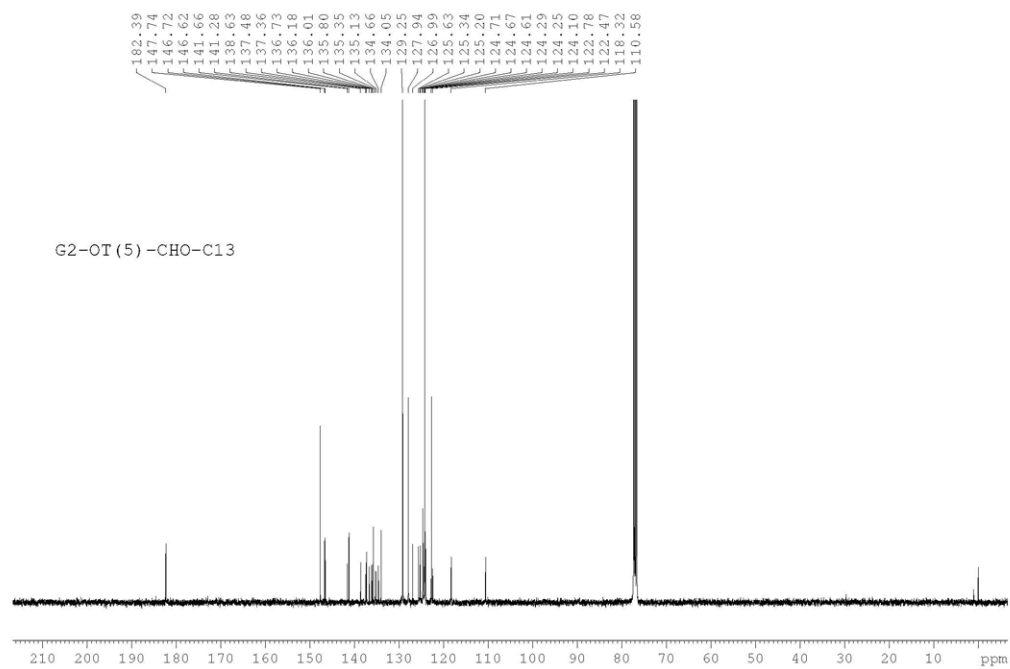

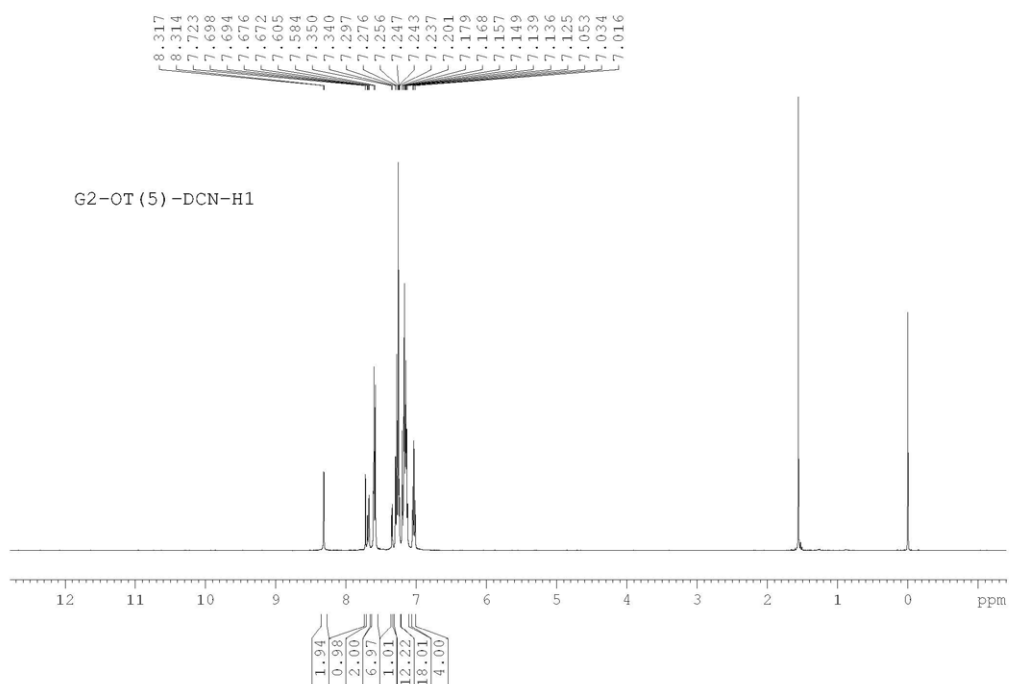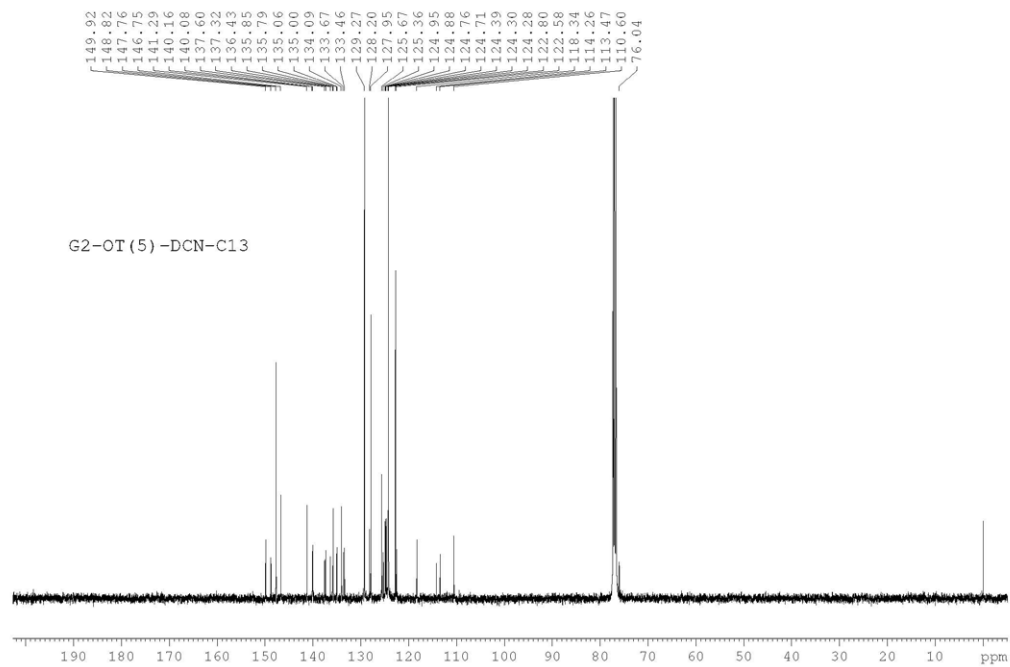



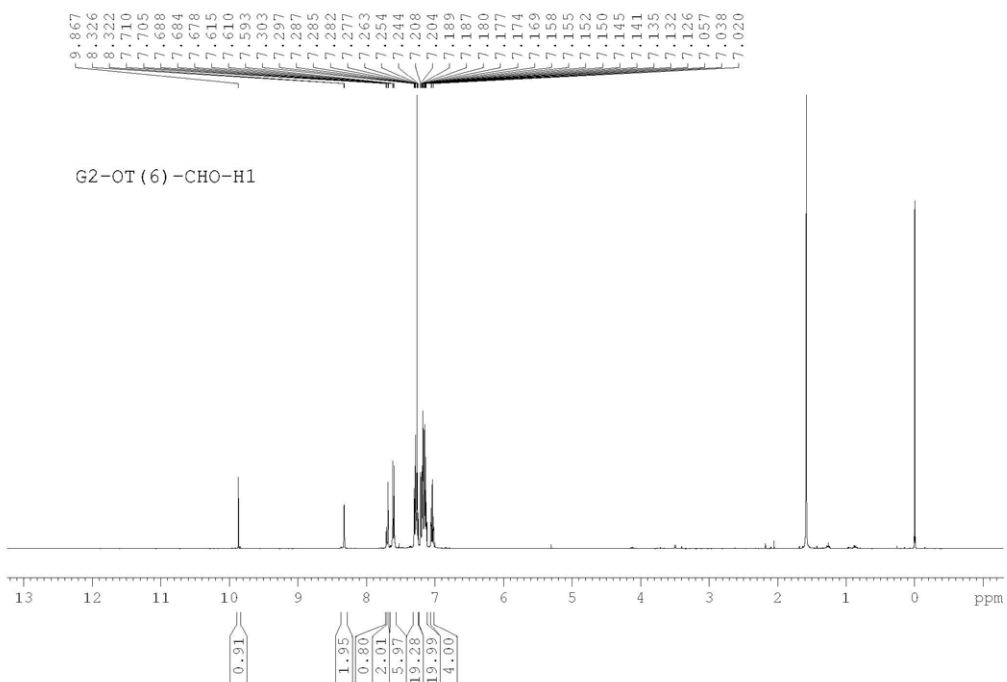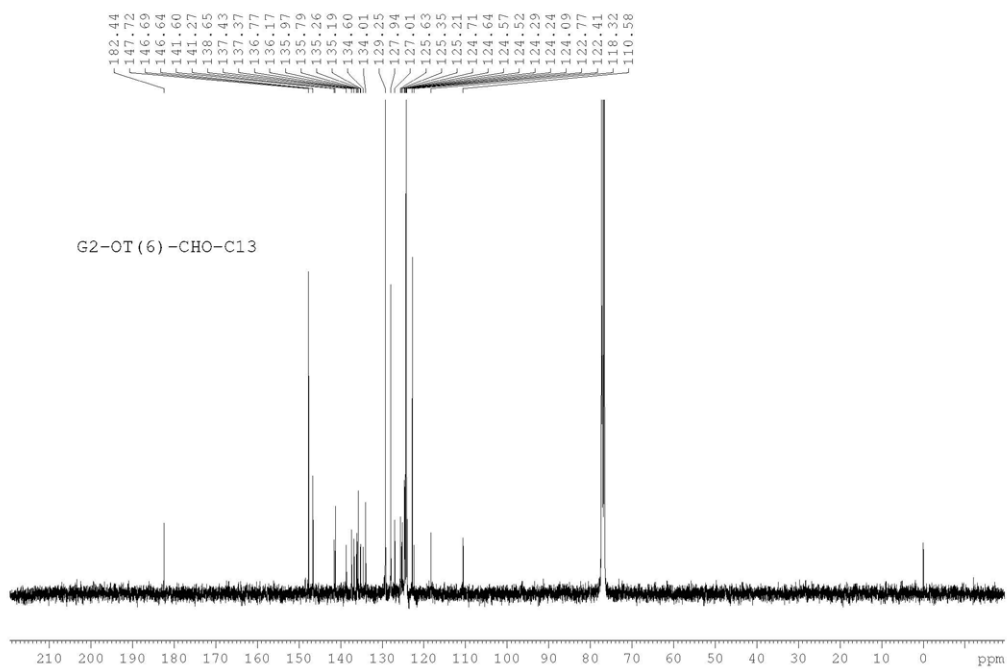

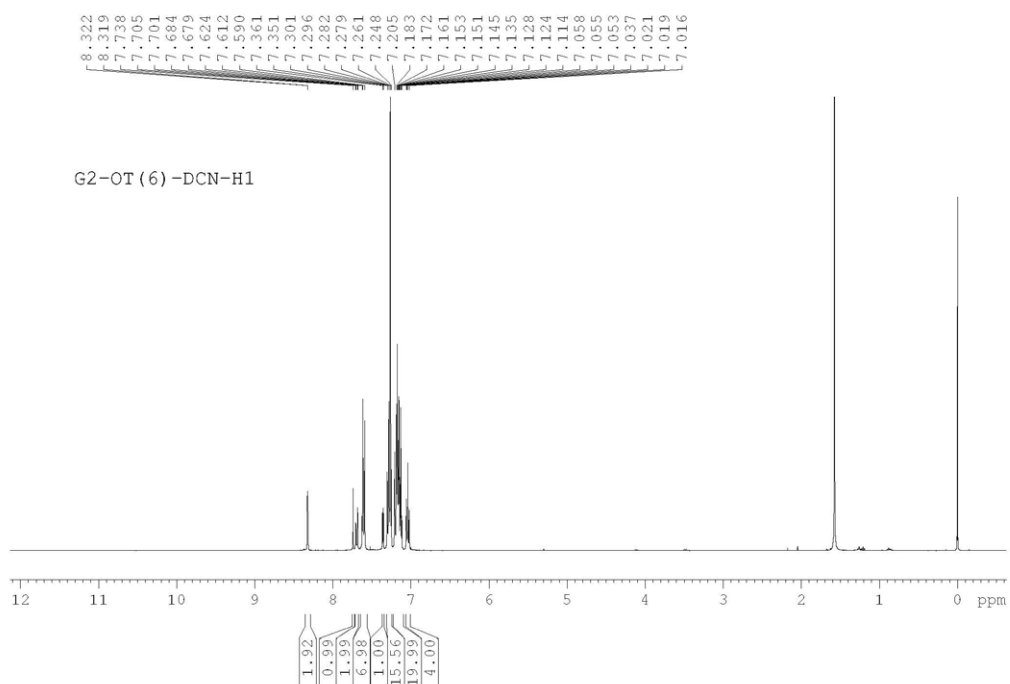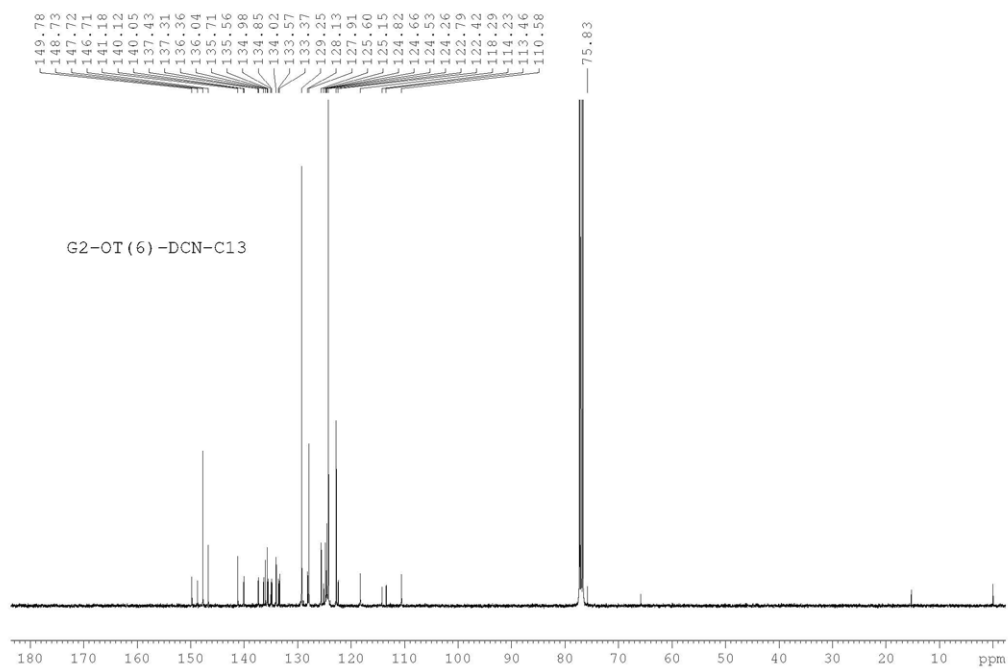

Supplement: b926203b.pdf [file b926203b.pdf]
